# Supplementary material for: Novel synthesis and formation process of uniform Mn2O3 cubes
Source: Royal Society of Chemistry journal article supplement (doi:10.1039/c2ce26176f), 2012-01-01
Supplement: c2ce26176f.pdf [file c2ce26176f.pdf]

## Supporting information

Novel Synthesis and Formation Process of Uniform Mn<sub>2</sub>O<sub>3</sub> Cubes

Jianfang Wang<sup>1</sup>, Gang Zhu<sup>1</sup>, Lingjuan Deng<sup>1</sup>, Liping Kang<sup>1</sup>, Zhengping Hao<sup>2</sup>, and

Zong-Huai Liu\*<sup>1</sup>

<sup>1</sup>Key Laboratory of Applied Surface and Colloid Chemistry (Shaanxi Normal University), Ministry of Education, Xi'an, 710062, P. R. China; School of Materials Science and Engineering, Shaanxi Normal University, Xi'an, 710062, P. R. China.

<sup>2</sup>Research Center for Eco-Environmental Sciences, Chinese Academy of Sciences, Beijing, 100085, P. R. China

\*Correspondence to:

Zong-Huai Liu

School of Materials Science and Engineering, Shaanxi Normal University, Xi'an, 710064, P. R. China.

Tel: 86-29-81530716

Fax: 86-29-81530702

E-mail: [zhliu@snnu.edu.cn](mailto:zhliu@snnu.edu.cn)

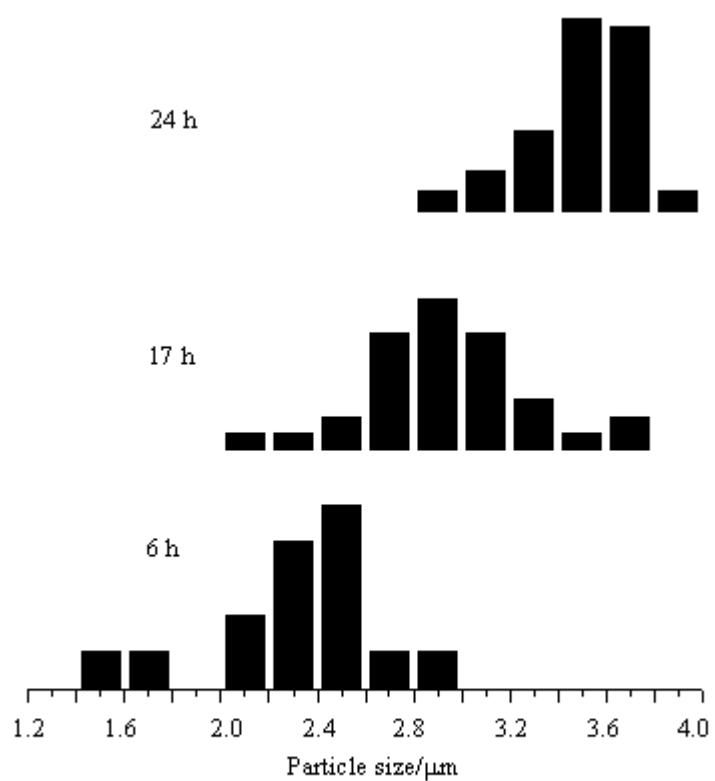

**Fig. S1.** The histogram of particle size distributions of obtained materials at different treatment times.

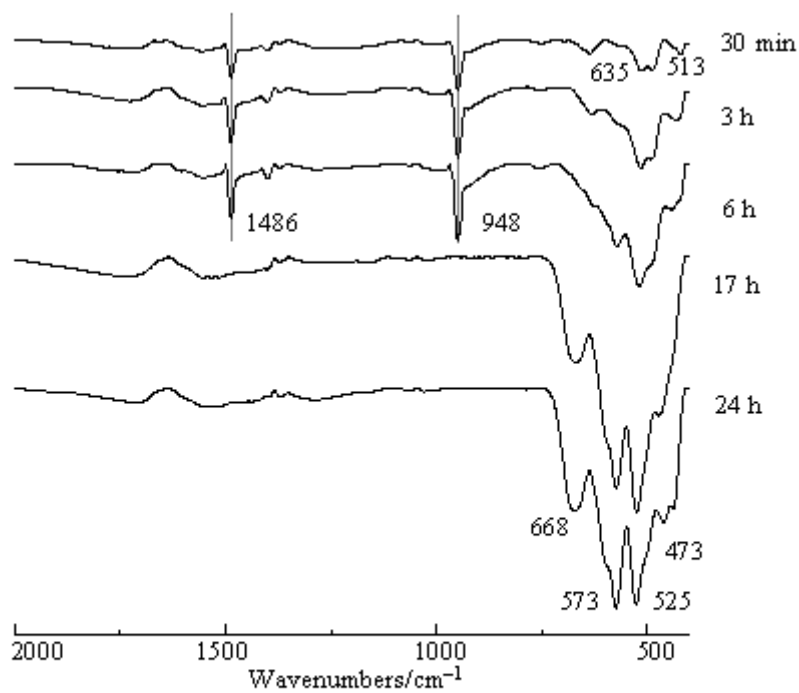

**Fig. S2.** IR spectra of the obtained materials at different hydrothermal treatment times.
